# Supplementary material
Source: PubMed Central journal article supplement (PMC3157282)

□ PBS-treated  
■ Minocycline-treated

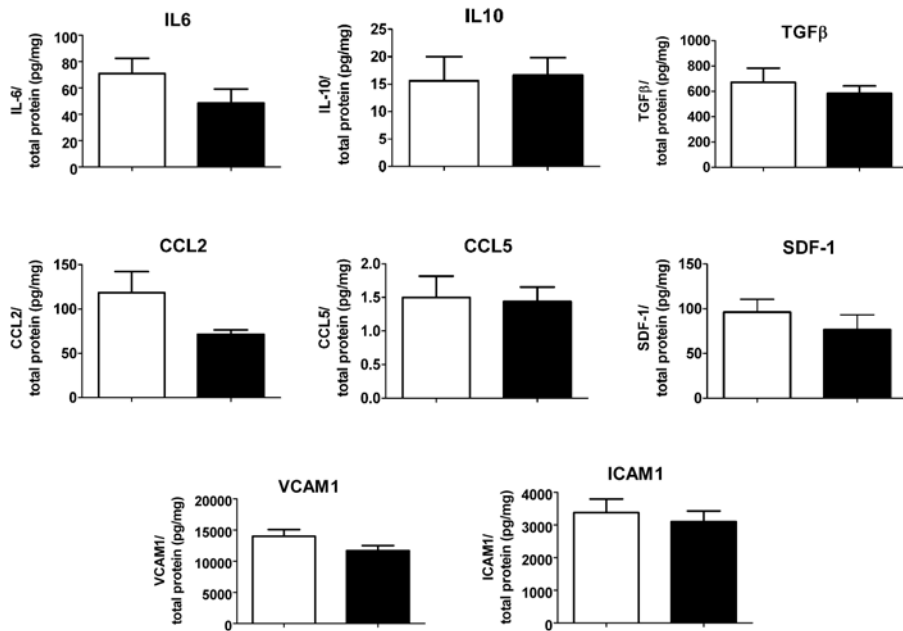

Supplement: mmc1.pdf [file mmc1.pdf]
